# Supplementary material
Source: publisher site journal article supplement (https://www.dovepress.com/article/341045)
Supplement: Supplementary file 1 [file get_supplementary_file.php]

**Supplementary Table 1.** Sample sizes used for building the models (total N=377,065).

| Model                         | Training set |           |          | Validation set |           |          |
|-------------------------------|--------------|-----------|----------|----------------|-----------|----------|
|                               | All samples  | HCC cases | Controls | All samples    | HCC cases | Controls |
| Base Model                    | 226239       | 388       | 225851   | 150826         | 259       | 150567   |
| Overall                       | 226239       | 388       | 225851   | 150826         | 259       | 150567   |
| < 65 years                    | 150020       | 228       | 149792   | 100059         | 147       | 99912    |
| ≥ 65 years                    | 76219        | 160       | 76059    | 50767          | 112       | 50655    |
| Male                          | 129602       | 320       | 129282   | 86256          | 210       | 86046    |
| Female                        | 96637        | 68        | 96569    | 64570          | 49        | 64521    |
| White                         | 205472       | 325       | 205147   | 137096         | 210       | 136886   |
| Other                         | 17658        | 53        | 17605    | 11705          | 46        | 11659    |
| BMI <25 kg/m <sup>2</sup>     | 79354        | 86        | 79268    | 52694          | 56        | 52638    |
| BMI 25-29.9 kg/m <sup>2</sup> | 92653        | 162       | 92491    | 61859          | 111       | 61748    |
| BMI ≥30 kg/m <sup>2</sup>     | 48779        | 126       | 48653    | 32541          | 88        | 32453    |
| Diabetes-Yes                  | 20708        | 91        | 20617    | 13917          | 81        | 13836    |
| Diabetes-No                   | 205531       | 297       | 205234   | 136909         | 178       | 136731   |
| No alcohol intake             | 17888        | 40        | 17848    | 11933          | 31        | 11902    |
| Alcohol ≤ 20 g/d              | 175481       | 265       | 175216   | 117228         | 180       | 117048   |
| Alcohol > 20 g/d              | 32870        | 83        | 32787    | 21665          | 48        | 21617    |
| Excellent/very good Health    | 118764       | 126       | 118638   | 79223          | 91        | 79132    |
| Good Health                   | 76447        | 174       | 76273    | 50617          | 112       | 50505    |
| Fair/poor Health              | 27606        | 79        | 27527    | 18774          | 53        | 18721    |
| Independent Models            |              |           |          |                |           |          |
| < 65 years                    | 150047       | 225       | 149822   | 100032         | 150       | 99882    |
| ≥ 65 years                    | 76191        | 163       | 76028    | 50795          | 109       | 50686    |
| Male                          | 129515       | 318       | 129197   | 86343          | 212       | 86131    |
| Female                        | 96724        | 70        | 96654    | 64483          | 47        | 64436    |
| Diabetes-Yes                  | 20775        | 103       | 20672    | 13850          | 69        | 13781    |
| Diabetes-No                   | 205464       | 285       | 205179   | 136976         | 190       | 136786   |
| No alcohol intake             | 17893        | 43        | 17850    | 11928          | 28        | 11900    |
| Alcohol ≤ 20 g/d              | 175625       | 267       | 175358   | 117084         | 178       | 116906   |
| Alcohol > 20 g/d              | 32721        | 79        | 32642    | 21814          | 52        | 21762    |

Abbreviations: BMI, body mass index

**Supplementary Table 2:** Performance metrics of the 15 models evaluated in MATLAB for HCC risk prediction

| Elaborate model with 14 features and 5-fold cross-validation |       |             |             |                   |                     |                             |
|--------------------------------------------------------------|-------|-------------|-------------|-------------------|---------------------|-----------------------------|
| Algorithm <sup>a</sup>                                       | AUC   | Sensitivity | Specificity | Confusion Matrix  |                     |                             |
|                                                              |       |             |             | Predictions       | True HCC<br>(n=388) | True Non-HCC<br>(n=225,851) |
| Fine Tree                                                    | 0.620 | 0.000       | 1.000       | Predicted HCC     | 0                   | 23                          |
|                                                              |       |             |             | Predicted Non-HCC | 388                 | 225828                      |
| Medium Tree                                                  | 0.600 | 0.000       | 1.000       | Predicted HCC     | 0                   | 0                           |
|                                                              |       |             |             | Predicted Non-HCC | 388                 | 225851                      |
| Coarse Tree                                                  | 0.580 | 0.000       | 1.000       | Predicted HCC     | 0                   | 0                           |
|                                                              |       |             |             | Predicted Non-HCC | 388                 | 225851                      |
| Logistic Regression                                          | 0.750 | 0.000       | 1.000       | Predicted HCC     | 0                   | 0                           |
|                                                              |       |             |             | Predicted Non-HCC | 388                 | 225851                      |
| Gaussian Naive Bayes                                         | 0.660 | 0.049       | 0.984       | Predicted HCC     | 19                  | 3553                        |
|                                                              |       |             |             | Predicted Non-HCC | 369                 | 222298                      |
| Kernel Naive Bayes                                           | 0.640 | 0.003       | 1.000       | Predicted HCC     | 1                   | 69                          |
|                                                              |       |             |             | Predicted Non-HCC | 387                 | 225782                      |
| Linear Support Vector Machines                               | 0.530 | 0.000       | 1.000       | Predicted HCC     | 0                   | 0                           |
|                                                              |       |             |             | Predicted Non-HCC | 388                 | 225851                      |
| Quadratic Support Vector Machines                            | 0.460 | 0.000       | 1.000       | Predicted HCC     | 0                   | 0                           |
|                                                              |       |             |             | Predicted Non-HCC | 388                 | 225851                      |
| Cubic Support Vector Machines                                | 0.510 | 0.000       | 1.000       | Predicted HCC     | 0                   | 16                          |
|                                                              |       |             |             | Predicted Non-HCC | 388                 | 225835                      |
| Fine Gaussian Support Vector Machines                        | 0.590 | 0.000       | 1.000       | Predicted HCC     | 0                   | 0                           |
|                                                              |       |             |             | Predicted Non-HCC | 388                 | 225851                      |
| Medium Gaussian Support Vector Machines                      | 0.490 | 0.000       | 1.000       | Predicted HCC     | 0                   | 0                           |
|                                                              |       |             |             | Predicted Non-HCC | 388                 | 225851                      |
| Coarse Gaussian Support Vector Machines                      | 0.480 | 0.000       | 1.000       | Predicted HCC     | 0                   | 0                           |
|                                                              |       |             |             | Predicted Non-HCC | 388                 | 225851                      |
| Ensemble Boosted Trees                                       | 0.630 | 0.000       | 1.000       | Predicted HCC     | 0                   | 0                           |
|                                                              |       |             |             | Predicted Non-HCC | 388                 | 225851                      |
| Ensemble Bagged Trees (Random Forest)                        | 0.590 | 0.000       | 1.000       | Predicted HCC     | 0                   | 0                           |
|                                                              |       |             |             | Predicted Non-HCC | 388                 | 225851                      |
| Ensemble RUSBoosted Trees <sup>b</sup>                       | 0.720 | 0.680       | 0.632       | Predicted HCC     | 264                 | 83108                       |
|                                                              |       |             |             | Predicted Non-HCC | 124                 | 142743                      |

---

<sup>a</sup>Fifteen algorithms that can accommodate both categorical and numerical variables were evaluated in MATLAB 2019b (MathWorks, Natick, MA) for HCC risk prediction.

<sup>b</sup>The Ensemble RUSBoosted Trees model was chosen for risk prediction due to its overall superior performance in terms of AUC, sensitivity, and specificity collectively compared to the other 14 models.

Abbreviations: AUC, area under the curve; HCC, hepatocellular carcinoma

---

---

**Supplementary Table 3.** Variables used for model training and validation

---

| <b>Variable</b>                                               | <b>Format used for model training and validation</b> |
|---------------------------------------------------------------|------------------------------------------------------|
| Age at baseline <sup>a</sup>                                  | Continuous                                           |
| Sex <sup>a</sup>                                              | Male, Female                                         |
| Body mass index (BMI, kg/m <sup>2</sup> ) <sup>a</sup>        | Continuous                                           |
| Height (meters)                                               | Continuous                                           |
| Diabetes <sup>a</sup>                                         | Yes, no                                              |
| Self-reported general health condition <sup>a</sup>           | Excellent/very good, Good, Fair/poor                 |
| Alcohol use, g/d <sup>a</sup>                                 | Continuous                                           |
| Moderate to vigorous physical activity <sup>a</sup>           | < 3 times/week vs. ≥3 times/week                     |
| Cholesterol, mg/d                                             | Continuous                                           |
| Saturated fat, g/d                                            | Continuous                                           |
| Trans-fatty acids, g/d                                        | Continuous                                           |
| Ounce equivalents of lean meat from eggs per day <sup>a</sup> | Continuous                                           |
| Vitamin B <sub>6</sub> , mg/d                                 | Continuous                                           |
| Healthy Eating Index score <sup>a</sup>                       | Continuous                                           |

---

<sup>a</sup>These variables were found to be statistically significant in a multivariable logistic regression model and were used to build a separate 9-variable model

---

**Supplementary Table 4.** Results for the base model<sup>a</sup> and stratified by patient characteristics in the validation sample

| <b>Participant Characteristics</b> | <b>Sensitivity</b> | <b>Specificity</b> | <b>AUC</b> |
|------------------------------------|--------------------|--------------------|------------|
| < 65 years                         | 0.633              | 0.658              | 0.645      |
| ≥ 65 years                         | 0.786              | 0.518              | 0.652      |
| Male                               | 0.848              | 0.344              | 0.596      |
| Female                             | 0.061              | 0.967              | 0.514      |
| White                              | 0.729              | 0.607              | 0.668      |
| Other                              | 0.565              | 0.649              | 0.607      |
| BMI <25 kg/m <sup>2</sup>          | 0.643              | 0.744              | 0.694      |
| BMI 25-29.9 kg/m <sup>2</sup>      | 0.748              | 0.559              | 0.653      |
| BMI ≥30 kg/m <sup>2</sup>          | 0.682              | 0.489              | 0.585      |
| Diabetes-Yes                       | 0.790              | 0.329              | 0.559      |
| Diabetes-No                        | 0.657              | 0.639              | 0.648      |
| No alcohol intake                  | 0.452              | 0.605              | 0.529      |
| Alcohol >0 to20 g/d                | 0.700              | 0.638              | 0.669      |
| Alcohol ≥ 20 g/d                   | 0.854              | 0.466              | 0.660      |
| Excellent/Very Good Health         | 0.560              | 0.710              | 0.635      |
| Good Health                        | 0.759              | 0.519              | 0.639      |
| Fair/Poor Health                   | 0.792              | 0.436              | 0.614      |

<sup>a</sup>The variables used for constructing the base model are reported in Supplementary Table 1, samples sizes are provided in Supplementary Table 2.

Abbreviations: BMI, body mass index

---

**Supplementary Table 5.** Results for independent models<sup>a</sup> tested in the validation sample

---

| <b>Patient characteristics</b> | <b>Sensitivity</b> | <b>Specificity</b> | <b>AUC</b> |
|--------------------------------|--------------------|--------------------|------------|
| < 65 years                     | 0.693              | 0.659              | 0.676      |
| ≥ 65 years                     | 0.624              | 0.607              | 0.615      |
| Male                           | 0.547              | 0.644              | 0.596      |
| Female                         | 0.553              | 0.670              | 0.611      |
| Diabetes-Yes                   | 0.478              | 0.603              | 0.540      |
| Diabetes-No                    | 0.674              | 0.604              | 0.639      |
| No Alcohol                     | 0.500              | 0.598              | 0.549      |
| 0-20 g of Alcohol              | 0.697              | 0.627              | 0.662      |
| ≥ 20 g of Alcohol              | 0.596              | 0.630              | 0.613      |

---

<sup>a</sup>The variables used for constructing the base model are reported in Supplementary Table 1, samples sizes are provided in Supplementary Table 2.

Abbreviations: BMI, body mass index

---

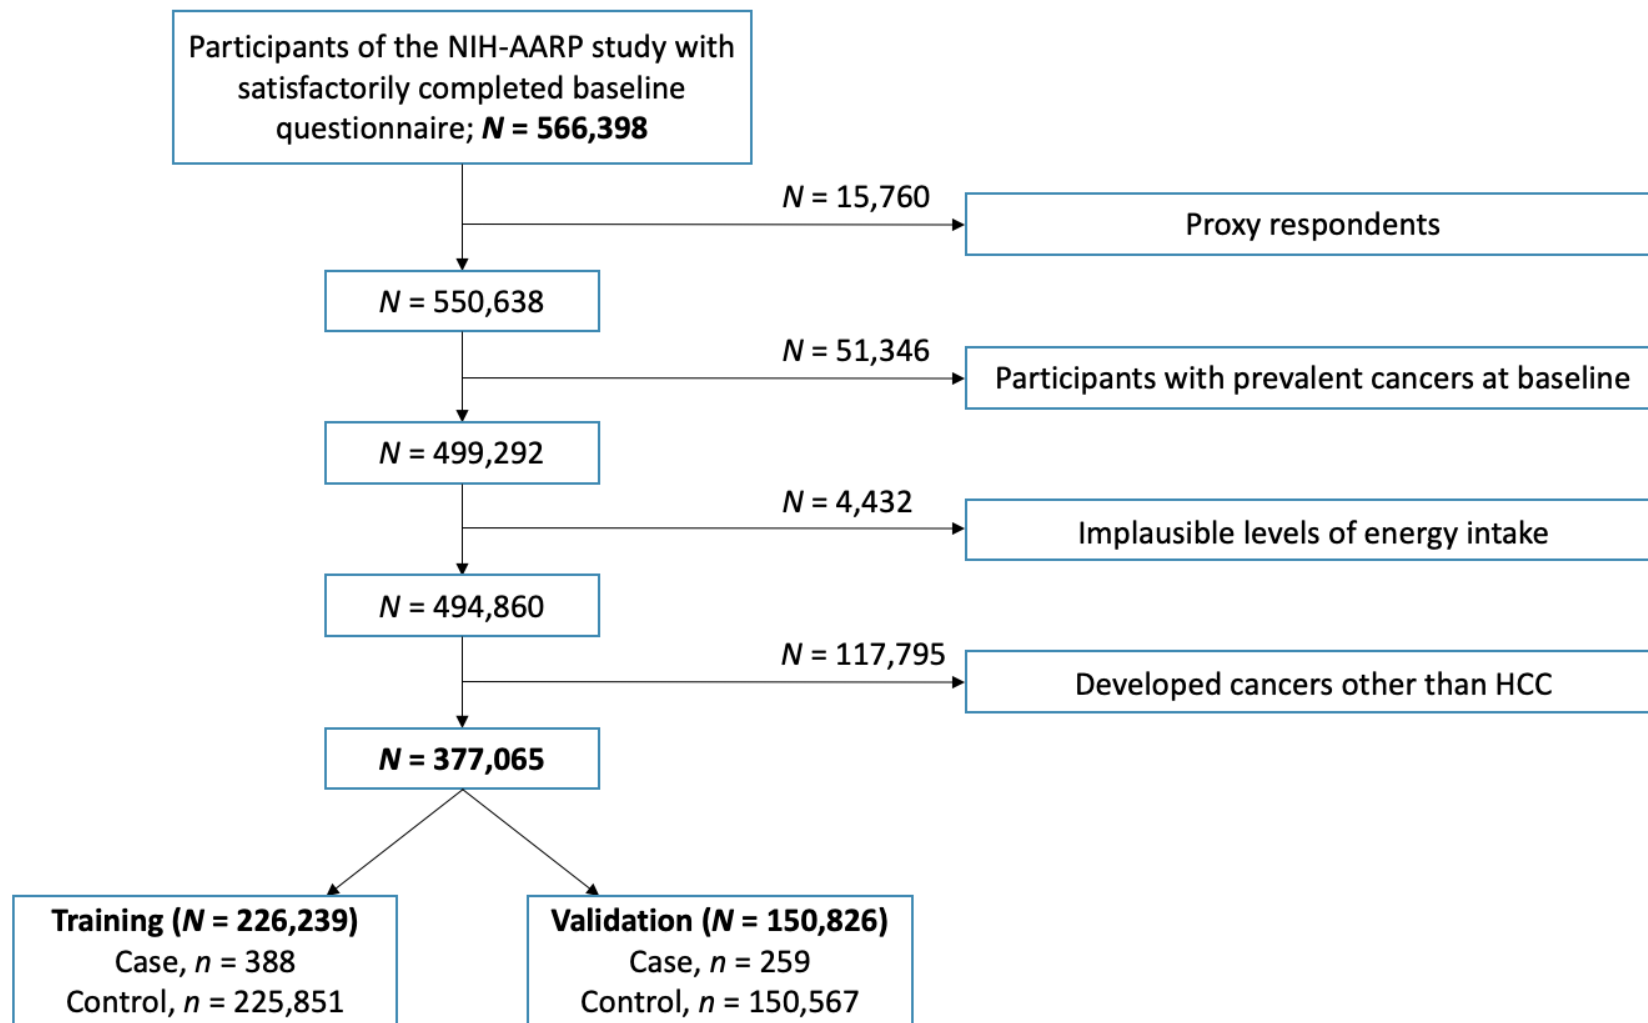

**Supplementary Figure 1.** Flowchart showing variable selection process; the NIH-AARP Diet and Health Study prospective cohort (1995-1996, with follow-up to 2011). Abbreviations: HCC, hepatocellular carcinoma.

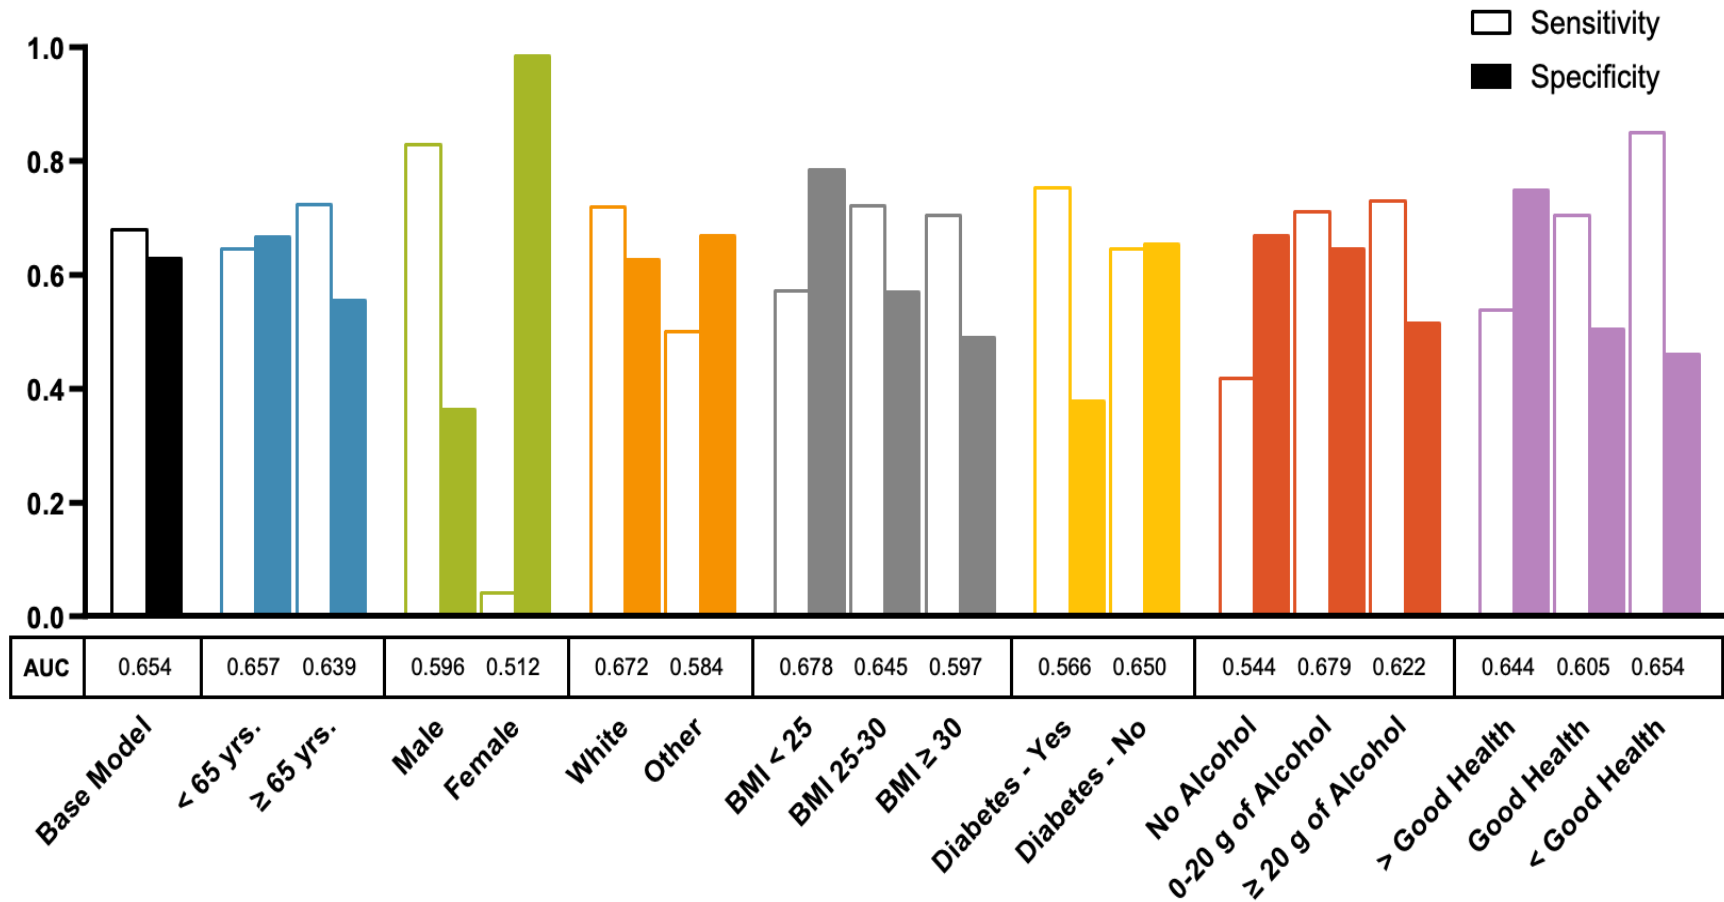

**Supplementary Figure 2.** Performance of the elaborate base model for hepatocellular carcinoma risk prediction across population subgroups defined by age, gender, race, body mass index (BMI), diabetes status, alcohol intake, and self-reported general health condition among participants in the NIH-AARP Diet and Health Study prospective cohort (N=377,065; cases: 647, controls=376,418). The elaborate base model was built based on the following variables and then stratified by the patient characteristics: age (continuous), sex, BMI (continuous), height (continuous) diabetes (yes, no), general health status (excellent/very good, good, fair/poor), alcohol (continuous), moderate-to-vigorous physical activity (< 3 times/week, ≥3 times/week), dietary cholesterol (continuous), saturated fat (continuous), trans-fatty acids (continuous), ounce equivalents of lean meat from eggs per day (continuous), dietary vitamin B6 (mg/d, continuous), and healthy eating index scores (continuous).



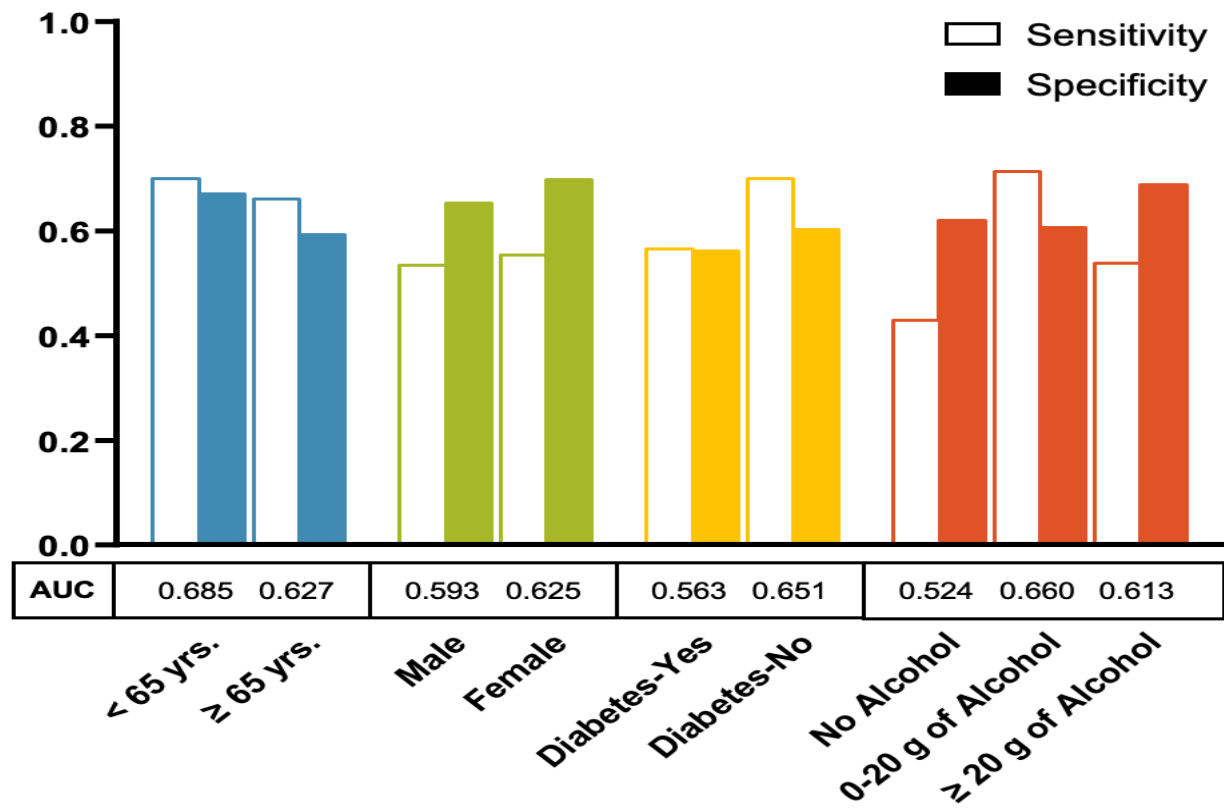

**Supplementary Figure 3.** Hepatocellular carcinoma risk prediction models developed separately by age, gender, diabetes status, and alcohol intake among participants in the NIH-AARP Diet and Health Study prospective cohort. Each model was built separately based on the following 14 variables (the elaborate model variables): age (continuous), sex, BMI (continuous), height (continuous) diabetes (yes, no), general health status (excellent/very good, good, fair/poor), alcohol (continuous), moderate-to-vigorous physical activity (< 3 times/week, ≥3 times/week), dietary cholesterol (continuous), saturated fat (continuous), trans-fatty acids (continuous), ounce equivalents of lean meat from eggs per day (continuous), dietary vitamin B6 (mg/d, continuous), and healthy eating index scores (continuous).
